# Supplementary material for: Cytotoxicity and Pharmacogenomics of Medicinal Plants from Traditional Korean Medicine
Source: PubMed Central journal article supplement (PMC3725712; doi:10.1155/2013/341724), 2013-07-11
Supplement: 341724.f1.pdf [file 341724.f1.pdf]

# Cytotoxicity towards cancer cells and pharmacogenomics of medicinal plants from traditional Korean medicine

Victor Kuete\*, Ean-Jeong Seo\*, Benjamin Krusche, Mira Oswald, Benjamin Wiench, Sven Schröder, Henry Johannes Greten, Ik-Soo Lee, Thomas Efferth

-----

**Supplementary Table:** Extracts of medicinal plants used in traditional Korean medicine investigated for cytotoxic activity towards cancer cells

| Samples names                                      | Part              | Identification Codes | Extraction solvent |
|----------------------------------------------------|-------------------|----------------------|--------------------|
| <i>Equisetum hyemale</i>                           | Whole plant       | PB1136.1             | MeOH               |
| <i>Osmunda japonica</i>                            | Whole plant       | PB1149.1             | MeOH               |
| <i>Matteuccia struthiopteris</i>                   | Whole plant       | PB1194.1             | MeOH               |
| <i>Dryopteris lacera</i>                           | Whole plant       | PB1233.1             | MeOH               |
| <i>Torreya nucifera</i>                            | Leaves            | PB1363.1             | MeOH               |
| <i>Torreya nucifera</i>                            | Stems             | PB1363.2             | MeOH               |
| <i>Abies koreana</i>                               | Leaves            | PB1374.3             | MeOH               |
| <i>Abies koreana</i>                               | Stems             | PB1374.4             | MeOH               |
| <i>Pinus thunbergii</i>                            | Stems-Heartwood   | PB1401.2             | MeOH               |
| <i>Pinus thunbergii</i>                            | Stems-Stembark    | PB1401.3             | MeOH               |
| <i>Pinus thunbergii</i>                            | Leaves            | PB1401.4             | MeOH               |
| <i>Arisaema ringens</i>                            | Whole plant       | PB1947.1             | MeOH               |
| <i>Arisaema amurense</i> var. <i>serratum</i>      | Whole plant       | PB1951.1             | MeOH               |
| <i>Symplocarpus nipponicus</i>                     | Whole plant       | PB1955.1             | MeOH               |
| <i>Luzula capitata</i>                             | Whole plant       | PB1982.1             | MeOH               |
| <i>Heloniopsis orientalis</i>                      | Whole plant       | PB2011.1             | MeOH               |
| <i>Hosta minor</i>                                 | Whole plant       | PB2027.1             | MeOH               |
| <i>Hemerocallis minor</i>                          | Underground parts | PB2044.3             | MeOH               |
| <i>Allium victorialis</i> var. <i>platyphyllum</i> | Roots             | PB2048.1             | MeOH               |
| <i>Allium grayi</i>                                | Whole plant       | PB2052.1             | MeOH               |
| <i>Majanthemum dilatatum</i>                       | Whole plant       | PB2114.3             | MeOH               |
| <i>Paris verticillata</i>                          | Whole plant       | PB2122.2             | MeOH               |
| <i>Trillium kamschatcicum</i>                      | Whole plant       | PB2124.1             | MeOH               |
| <i>Lycoris radiata</i>                             | Leaves            | PB2148.1             | MeOH               |
| <i>Lycoris radiata</i>                             | Underground parts | PB2148.2             | MeOH               |
| <i>Dioscorea batatas</i>                           | Fruits            | PB2154.2             | MeOH               |
| <i>Cremastra appendiculata</i>                     | Whole plant       | PB2247.1             | MeOH               |
| <i>Piper kadsura</i>                               | Leaves            | PB2263.1             | MeOH               |
| <i>Salix hultenii</i>                              | Flowers           | PB2299.2             | MeOH               |
| <i>Myrica rubra</i>                                | Stems-Heartwood   | PB2326.2             | MeOH               |
| <i>Myrica rubra</i>                                | Stems-Stembark    | PB2326.3             | MeOH               |

|                                                    |                 |          |      |
|----------------------------------------------------|-----------------|----------|------|
| <i>Alnus japonica</i>                              | Leaves          | PB2350.1 | MeOH |
| <i>Alnus japonica</i>                              | Stems-Heartwood | PB2350.2 | MeOH |
| <i>Alnus japonica</i>                              | Stems-Stembark  | PB2350.3 | MeOH |
| <i>Alnus maximowiczii</i>                          | Leaves          | PB2364.4 | MeOH |
| <i>Carpinus laxiflora</i>                          | Stems-Heartwood | PB2373.2 | MeOH |
| <i>Castanopsis cuspidata</i> var. <i>sieboldii</i> | Leaves          | PB2392.1 | MeOH |
| <i>Quercus acutissima</i>                          | Leaves          | PB2395.1 | MeOH |
| <i>Quercus acutissima</i>                          | Stems-Heartwood | PB2395.2 | MeOH |
| <i>Quercus acutissima</i>                          | Stems-Stembark  | PB2395.3 | MeOH |
| <i>Quercus acuta</i>                               | Leaves          | PB2418.1 | MeOH |
| <i>Quercus acuta</i>                               | Stems           | PB2418.2 | MeOH |
| <i>Quercus glauca</i>                              | Stems-Heartwood | PB2420.2 | MeOH |
| <i>Quercus salicina</i>                            | Leaves          | PB2423.1 | MeOH |
| <i>Quercus salicina</i>                            | Stems-Heartwood | PB2423.2 | MeOH |
| <i>Quercus salicina</i>                            | Stems-Stembark  | PB2423.3 | MeOH |
| <i>Quercus gilva</i>                               | Leaves          | PB2425.1 | MeOH |
| <i>Quercus gilva</i>                               | Stems-Heartwood | PB2425.2 | MeOH |
| <i>Quercus gilva</i>                               | Stems-Stembark  | PB2425.3 | MeOH |
| <i>Celtis choseniana</i>                           | Fruits          | PB2447.3 | MeOH |
| <i>Broussonetia kazinoki</i> var. <i>humilis</i>   | Leaves          | PB2471.1 | MeOH |
| <i>Broussonetia kazinoki</i> var. <i>humilis</i>   | Stems           | PB2471.2 | MeOH |
| <i>Ficus erecta</i>                                | Fruits          | PB2475.1 | MeOH |
| <i>Ficus erecta</i>                                | Stems-Heartwood | PB2475.3 | MeOH |
| <i>Ficus thunbergii</i>                            | Leaves          | PB2479.1 | MeOH |
| <i>Ficus thunbergii</i>                            | Stems           | PB2479.2 | MeOH |
| <i>Loranthus yadoriki</i>                          | Leaves          | PB2515.1 | MeOH |
| <i>Loranthus yadoriki</i>                          | Stems           | PB2515.2 | MeOH |
| <i>Pseudixus japonicus</i>                         | Whole plant     | PB2519.1 | MeOH |
| <i>Asarum maculatum</i>                            | Whole plant     | PB2522.1 | MeOH |
| <i>Asarum sieboldii</i>                            | Whole plant     | PB2523.1 | MeOH |
| <i>Rumex japonica</i>                              | Whole plant     | PB2529.1 | MeOH |
| <i>Bistorta manshuriensis</i>                      | Whole plant     | PB2541.1 | MeOH |
| <i>Reynoutria sachalinensis</i>                    | Leaves          | PB2552.1 | MeOH |
| <i>Reynoutria sachalinensis</i>                    | Fruits          | PB2552.3 | MeOH |
| <i>Reynoutria sachalinensis</i>                    | Roots           | PB2552.6 | MeOH |
| <i>Phytolacca esculenta</i>                        | Leaves, Stems   | PB2638.1 | MeOH |
| <i>Phytolacca esculenta</i>                        | Roots           | PB2638.2 | MeOH |
| <i>Cercidiphyllum japonicum</i>                    | Leaves          | PB2719.1 | MeOH |
| <i>Cercidiphyllum japonicum</i>                    | Stems-Heartwood | PB2719.2 | MeOH |
| <i>Cercidiphyllum japonicum</i>                    | Stems-Stembark  | PB2719.3 | MeOH |
| <i>Anemone koraiensis</i>                          | Whole plant     | PB2759.1 | MeOH |
| <i>Anemone reflexa</i>                             | Whole plant     | PB2761.1 | MeOH |
| <i>Ranunculus japonicus</i>                        | Whole plant     | PB2770.1 | MeOH |
| <i>Aconitum longecassidatum</i>                    | Whole plant     | PB2808.1 | MeOH |
| <i>Caltha palustris</i> var. <i>membranacea</i>    | Whole plant     | PB2846.1 | MeOH |
| <i>Stauntonia hexaphylla</i>                       | Leaves          | PB2861.1 | MeOH |
| <i>Berberis koreana</i>                            | Leaves, Stems   | PB2863.1 | MeOH |

|                                                     |                  |           |      |
|-----------------------------------------------------|------------------|-----------|------|
| <i>Berberis amurensis</i> var. <i>lactifolia</i>    | Stems            | PB2867.3  | MeOH |
| <i>Epimedium koreanum</i>                           | Whole plant      | PB2873.1  | MeOH |
| <i>Sinomenium acutum</i>                            | Stems, Roots     | PB2878.2  | MeOH |
| <i>Magnolia kobus</i>                               | Leaves           | PB2885.1  | MeOH |
| <i>Magnolia kobus</i>                               | Stems-Heartwood  | PB2885.2  | MeOH |
| <i>Magnolia kobus</i>                               | Stems-Stembark   | PB2885.3  | MeOH |
| <i>Schisandra chinensis</i>                         | Leaves, Flowers  | PB2892.1  | MeOH |
| <i>Schisandra chinensis</i>                         | Stems            | PB2892.2  | MeOH |
| <i>Illicium religiosum</i>                          | Leaves           | PB2898.1  | MeOH |
| <i>Lindera glauca</i>                               | Stems            | PB2904.1  | MeOH |
| <i>Cinnamomum camphora</i>                          | Stems-Heartwood  | PB2906.2  | MeOH |
| <i>Cinnamomum camphora</i>                          | Stems-Stembark   | PB2906.3  | MeOH |
| <i>Cinnamomum japonicum</i>                         | Leaves           | PB2907.4  | MeOH |
| <i>Cinnamomum japonicum</i>                         | Stems            | PB2907.5  | MeOH |
| <i>Machilus thunbergii</i>                          | Stems-Heartwood  | PB2910.2  | MeOH |
| <i>Machilus japonica</i>                            | Twigs            | PB2912.2  | MeOH |
| <i>Actinodaphne lancifolia</i>                      | Leaves           | PB2915.1  | MeOH |
| <i>Actinodaphne lancifolia</i>                      | Twigs            | PB2915.2  | MeOH |
| <i>Litsea japonica</i>                              | Leaves           | PB2916.1  | MeOH |
| <i>Hylomecon vernale</i>                            | Whole plant      | PB2923.1  | MeOH |
| <i>Corydalis grandicalyx</i>                        | Whole plant      | PB2931A.1 | MeOH |
| <i>Corydalis incisa</i>                             | Whole plant      | PB2937.2  | MeOH |
| <i>Corydalis heterocarpa</i> var. <i>aponica</i>    | Aerial parts     | PB2941.1  | MeOH |
| <i>Lepidium ruderae</i>                             | Whole plant      | PB2955.1  | MeOH |
| <i>Cardamine amaraeformis</i>                       | Whole plant      | PB2963A.1 | MeOH |
| <i>Wasabia koreana</i>                              | Whole plant      | PB2972.1  | MeOH |
| <i>Sedum takesimense</i>                            | Whole plant      | PB3020.3  | MeOH |
| <i>Sedum middendorffianum</i>                       | Whole plant      | PB3029.1  | MeOH |
| <i>Kirengeshoma koreana</i>                         | Aerial parts     | PB3072.1  | MeOH |
| <i>Kirengeshoma koreana</i>                         | Roots            | PB3072.2  | MeOH |
| <i>Ribes fasciculatum</i> var. <i>chinense</i>      | Stems            | PB3107.2  | MeOH |
| <i>Distylium racemosum</i>                          | Twigs            | PB3118.2  | MeOH |
| <i>Hamamelis japonica</i>                           | Flowers, Stems   | PB3121.1  | MeOH |
| <i>Sorbaria sorbifolia</i> var. <i>stellipila</i>   | Leaves           | PB3128.1  | MeOH |
| <i>Sorbaria sorbifolia</i> var. <i>stellipila</i>   | Stems            | PB3128.2  | MeOH |
| <i>Spiraea prunifolia</i> var. <i>simpliciflora</i> | Branches, Leaves | PB3132.1  | MeOH |
| <i>Physocarpus intermedius</i>                      | Leaves, Stems    | PB3155.1  | MeOH |
| <i>Aruncus dioicus</i> var. <i>kamtschaticus</i>    | Flowers          | PB3161.1  | MeOH |
| <i>Rhodotypos scandens</i>                          | Fruits           | PB3163.1  | MeOH |
| <i>Waldsteinia ternata</i>                          | Whole plant      | PB3193.1  | MeOH |
| <i>Rubus corchorifolius</i>                         | Aerial parts     | PB3199.1  | MeOH |
| <i>Rubus takesimensis</i>                           | Leaves           | PB3203.1  | MeOH |
| <i>Rubus takesimensis</i>                           | Roots            | PB3203.2  | MeOH |
| <i>Rubus takesimensis</i>                           | Stems            | PB3203.3  | MeOH |
| <i>Rubus idaeus</i> var. <i>microphullus</i>        | Whole plant      | PB3211.1  | MeOH |
| <i>Rubus hirsutus</i>                               | Whole plant      | PB3220.2  | MeOH |
| <i>Rosa multiflora</i>                              | Branches, Leaves | PB3244.1  | MeOH |

|                                                 |                 |           |      |
|-------------------------------------------------|-----------------|-----------|------|
| <i>Prunus buergeriana</i>                       | Leaves          | PB3294.1  | MeOH |
| <i>Prunus buergeriana</i>                       | Stems-Stembark  | PB3294.2  | MeOH |
| <i>Prunus buergeriana</i>                       | Stems-Heartwood | PB3294.3  | MeOH |
| <i>Prunus yedoensis</i>                         | Leaves, Flowers | PB3304.1  | MeOH |
| <i>Prunus yedoensis</i>                         | Stems           | PB3304.2  | MeOH |
| <i>Prunus pendula</i> for. <i>ascendens</i>     | Leaves          | PB3306.1  | MeOH |
| <i>Prunus pendula</i> for. <i>ascendens</i>     | Stems-Heartwood | PB3306.2  | MeOH |
| <i>Prunus pendula</i> for. <i>ascendens</i>     | Stems-Stembark  | PB3306.3  | MeOH |
| <i>Prunus serrulata</i> var. <i>spontanea</i>   | Leaves          | PB3307.1  | MeOH |
| <i>Prunus serrulata</i> var. <i>spontanea</i>   | Stems-Heartwood | PB3307.2  | MeOH |
| <i>Prunus serrulata</i> var. <i>spontanea</i>   | Stems-Stembark  | PB3307.3  | MeOH |
| <i>Crataegus pinnatifida</i>                    | Fruits          | PB3329.1  | MeOH |
| <i>Eriobotrya japonica</i>                      | Leaves          | PB3339.1  | MeOH |
| <i>Eriobotrya japonica</i>                      | Stems-Heartwood | PB3339.2  | MeOH |
| <i>Eriobotrya japonica</i>                      | Stems-Stembark  | PB3339.3  | MeOH |
| <i>Chaenomeles lagenaria</i>                    | Stems           | PB3344.1  | MeOH |
| <i>Pyrus ussuriensis</i>                        | Leaves          | PB3355.1  | MeOH |
| <i>Pyrus calleryana</i> var. <i>fauriei</i>     | Fruits          | PB3367.1  | MeOH |
| <i>Pourthiaea villosa</i> var. <i>brunnea</i>   | Stems           | PB3374.2  | MeOH |
| <i>Caesalpinia japonica</i>                     | Leaves, Stems   | PB3403.1  | MeOH |
| <i>Maackia fauriei</i>                          | Leaves          | PB3413.1  | MeOH |
| <i>Maackia fauriei</i>                          | Stems-Heartwood | PB3413.2  | MeOH |
| <i>Maackia fauriei</i>                          | Stems-Stembark  | PB3413.3  | MeOH |
| <i>Lespedeza maximowiczii</i>                   | Leaves, Stems   | PB3421.1  | MeOH |
| <i>Vicia angustifolia</i> var. <i>segetalis</i> | Whole plant     | PB3466.3  | MeOH |
| <i>Caragana sinica</i>                          | Stems           | PB3534.1  | MeOH |
| <i>Oxalis articulata</i>                        | Whole plant     | PB3578A.1 | MeOH |
| <i>Phellodendron insulare</i>                   | Stems-Stembark  | PB3598.6  | MeOH |
| <i>Citrus dachibana</i>                         | Leaves          | PB3607A.1 | MeOH |
| <i>Citrus dachibana</i>                         | Stems-Heartwood | PB3607A.2 | MeOH |
| <i>Citrus dachibana</i>                         | Stems-Stembark  | PB3607A.3 | MeOH |
| <i>Melia azedarach</i> var. <i>japonica</i>     | Stems-Heartwood | PB3616.2  | MeOH |
| <i>Sapium japonicum</i>                         | Stems-Stembark  | PB3628.3  | MeOH |
| <i>Euphorbia jolkini</i>                        | Aerial parts    | PB3642.1  | MeOH |
| <i>Ilex crenata</i> var. <i>microphylla</i>     | Leaves          | PB3662.1  | MeOH |
| <i>Ilex crenata</i> var. <i>microphylla</i>     | Stems           | PB3662.2  | MeOH |
| <i>Ilex cornuta</i>                             | Leaves          | PB3663.1  | MeOH |
| <i>Ilex cornuta</i>                             | Stems-Heartwood | PB3663.2  | MeOH |
| <i>Ilex cornuta</i>                             | Stems-Stembark  | PB3663.3  | MeOH |
| <i>Ilex rotunda</i>                             | Stems           | PB3665.2  | MeOH |
| <i>Euonymus alatus</i>                          | Pericarpium     | PB3671.3  | MeOH |
| <i>Euonymus trapococcus</i>                     | Leaves          | PB3680.1  | MeOH |
| <i>Euonymus sieboldiana</i>                     | Fruits          | PB3681.1  | MeOH |
| <i>Acer mono</i>                                | Leaves          | PB3699.1  | MeOH |
| <i>Acer mono</i>                                | Stems-Heartwood | PB3699.2  | MeOH |
| <i>Acer mono</i>                                | Stems-Stembark  | PB3699.3  | MeOH |
| <i>Acer tschonoskii</i> var. <i>rubripes</i>    | Leaves          | PB3708.4  | MeOH |

|                                                      |                           |          |      |
|------------------------------------------------------|---------------------------|----------|------|
| <i>Acer tschonoskii</i> var. <i>rubripes</i>         | Stems                     | PB3708.5 | MeOH |
| <i>Acer barbinerve</i>                               | Leaves                    | PB3709.1 | MeOH |
| <i>Acer micro-sieboldianum</i>                       | Stems                     | PB3715.1 | MeOH |
| <i>Acer micro-sieboldianum</i>                       | Leaves                    | PB3715.2 | MeOH |
| <i>Acer pseudo-sieboldianum</i> var. <i>koreanum</i> | Leaves, Stems             | PB3717.1 | MeOH |
| <i>Acer okamotoanum</i>                              | Stems                     | PB3723.2 | MeOH |
| <i>Acer okamotoanum</i>                              | Leaves                    | PB3723.6 | MeOH |
| <i>Koelreuteria paniculata</i>                       | Stems                     | PB3737.3 | MeOH |
| <i>Meliosma oldhamii</i>                             | Stems-Stembark            | PB3739.2 | MeOH |
| <i>Meliosma oldhamii</i>                             | Stems-Heartwood           | PB3739.3 | MeOH |
| <i>Sageretia theezans</i>                            | Fruits                    | PB3751.2 | MeOH |
| <i>Sageretia theezans</i>                            | Leaves, Stems             | PB3751.3 | MeOH |
| <i>Vitis flexuosa</i>                                | Aerial parts              | PB3771.3 | MeOH |
| <i>Elaeocarpus sylvestris</i> var. <i>ellipticus</i> | Leaves                    | PB3781.1 | MeOH |
| <i>Elaeocarpus sylvestris</i> var. <i>ellipticus</i> | Stems                     | PB3781.2 | MeOH |
| <i>Actinidia arguta</i> var. <i>platyphylla</i>      | Leaves                    | PB3818.1 | MeOH |
| <i>Actinidia arguta</i> var. <i>platyphylla</i>      | Stems                     | PB3818.2 | MeOH |
| <i>Stewartia koreana</i>                             | Leaves                    | PB3820.1 | MeOH |
| <i>Stewartia koreana</i>                             | Stems                     | PB3820.2 | MeOH |
| <i>Camellia japonica</i>                             | Leaves                    | PB3823.4 | MeOH |
| <i>Camellia japonica</i>                             | Stems-Heartwood           | PB3823.5 | MeOH |
| <i>Camellia japonica</i>                             | Stems-Stembark            | PB3823.6 | MeOH |
| <i>Camellia japonica</i>                             | Fruits                    | PB3823.7 | MeOH |
| <i>Cleyera japonica</i>                              | Leaves                    | PB3827.1 | MeOH |
| <i>Cleyera japonica</i>                              | Stems-Heartwood           | PB3827.2 | MeOH |
| <i>Cleyera japonica</i>                              | Stems-Stembark            | PB3827.3 | MeOH |
| <i>Eurya japonica</i>                                | Leaves                    | PB3828.1 | MeOH |
| <i>Eurya japonica</i>                                | Stems-Heartwood           | PB3828.2 | MeOH |
| <i>Eurya japonica</i>                                | Stems-Stembark            | PB3828.3 | MeOH |
| <i>Eurya emarginata</i>                              | Leaves                    | PB3831.1 | MeOH |
| <i>Eurya emarginata</i>                              | Stems                     | PB3831.2 | MeOH |
| <i>Viola albida</i>                                  | Whole plant               | PB3848.1 | MeOH |
| <i>Viola keiskei</i>                                 | Whole plant               | PB3850.1 | MeOH |
| <i>Viola japonica</i>                                | Whole plant               | PB3864.2 | MeOH |
| <i>Viola tokubuchiana</i> var. <i>takedana</i>       | Whole plant               | PB3873.1 | MeOH |
| <i>Idesia polycarpa</i>                              | Leaves                    | PB3898.1 | MeOH |
| <i>Idesia polycarpa</i>                              | Stems                     | PB3898.5 | MeOH |
| <i>Xylosma congestum</i>                             | Leaves                    | PB3899.1 | MeOH |
| <i>Xylosma congestum</i>                             | Stems-Stembark            | PB3899.3 | MeOH |
| <i>Elaeagnus umbellata</i>                           | Leaves, Stems,<br>Flowers | PB3912.2 | MeOH |
| <i>Elaeagnus glabra</i>                              | Leaves                    | PB3917.3 | MeOH |
| <i>Elaeagnus glabra</i>                              | Stems-Heartwood           | PB3917.4 | MeOH |
| <i>Fatsia japonica</i>                               | Fruits                    | PB3966.4 | MeOH |
| <i>Acanthopanax sessiliflorus</i>                    | Stems                     | PB3973.1 | MeOH |
| <i>Acanthopanax chiisanensis</i>                     | Leaves                    | PB3975.1 | MeOH |
| <i>Acanthopanax senticosus</i>                       | Leaves, Stems             | PB3977.1 | MeOH |
| <i>Angelica gigas</i>                                | Whole plant               | PB4038.1 | MeOH |

|                                                                |                           |           |      |
|----------------------------------------------------------------|---------------------------|-----------|------|
| <i>Angelica japonica</i>                                       | Leaves                    | PB4043.1  | MeOH |
| <i>Angelica japonica</i>                                       | Stems, Roots              | PB4043.2  | MeOH |
| <i>Ostericum koreanum</i>                                      | Whole plant               | PB4048.1  | MeOH |
| <i>Heracleum moellendorffii</i>                                | Leaves                    | PB4056.1  | MeOH |
| <i>Heracleum moellendorffii</i>                                | Underground parts         | PB4056.2  | MeOH |
| <i>Aucuba japonica</i>                                         | Stems-Heartwood           | PB4061.5  | MeOH |
| <i>Aucuba japonica</i>                                         | Stems-Stembark            | PB4061.6  | MeOH |
| <i>Cornus controversa</i>                                      | Leaves                    | PB4064.2  | MeOH |
| <i>Cornus controversa</i>                                      | Stems-Stembark            | PB4064.3  | MeOH |
| <i>Cornus alba</i>                                             | Leaves, Stems             | PB4065.1  | MeOH |
| <i>Rhododendron yedoense</i> var.<br><i>poukhanense</i>        | Leaves, Stems             | PB4102.1  | MeOH |
| <i>Vaccinium bracteatum</i>                                    | Leaves                    | PB4117.1  | MeOH |
| <i>Vaccinium bracteatum</i>                                    | Stems-Stembark            | PB4117.3  | MeOH |
| <i>Vaccinium ddhami</i>                                        | Leaves                    | PB4119.1  | MeOH |
| <i>Vaccinium ddhami</i>                                        | Stems                     | PB4119.2  | MeOH |
| <i>Ardisia crenata</i>                                         | Leaves                    | PB4126.1  | MeOH |
| <i>Ardisia crenata</i>                                         | Stems                     | PB4126.2  | MeOH |
| <i>Primula jesoana</i>                                         | Whole plant               | PB4145.1  | MeOH |
| <i>Symplocos chinensis</i> for. <i>pilosa</i>                  | Stems                     | PB4161.2  | MeOH |
| <i>Styrax japonica</i>                                         | Leaves                    | PB4168.5  | MeOH |
| <i>Styrax japonica</i>                                         | Stems-Stembark            | PB4168.7  | MeOH |
| <i>Ligustrum japonicum</i>                                     | Leaves                    | PB4183.1  | MeOH |
| <i>Ligustrum japonicum</i>                                     | Twigs                     | PB4183.2  | MeOH |
| <i>Osmanthus insularis</i>                                     | Stems-Heartwood           | PB4199.2  | MeOH |
| <i>Forsythia koreana</i>                                       | Leaves, Stems,<br>Flowers | PB4206.1  | MeOH |
| <i>Forsythia nakaii</i>                                        | Stems                     | PB4208.1  | MeOH |
| <i>Syringa velutina</i> var. <i>kamibayashii</i> 'Miss<br>Kim' | Leaves, Stems             | PB4223A.1 | MeOH |
| <i>Trigonotis nakaii</i>                                       | Whole plant               | PB4315.1  | MeOH |
| <i>Callicarpa japonica</i> var. <i>leucocarpa</i>              | Fruits                    | PB4325.1  | MeOH |
| <i>Caryopteris incana</i>                                      | Leaves, Stems             | PB4338.1  | MeOH |
| <i>Ajuga decumbens</i>                                         | Whole plant               | PB4341.2  | MeOH |
| <i>Scutellaria indica</i>                                      | Whole plant               | PB4353.1  | MeOH |
| <i>Lamium album</i> var. <i>barbatum</i>                       | Whole plant               | PB4385.2  | MeOH |
| <i>Salvia chanroenica</i>                                      | Whole plant               | PB4391.1  | MeOH |
| <i>Isodon japonicus</i>                                        | Whole plant               | PB4422.1  | MeOH |
| <i>Scrophularia kakudensis</i>                                 | Roots                     | PB4463.1  | MeOH |
| <i>Scrophularia kakudensis</i>                                 | Aerial parts              | PB4463.2  | MeOH |
| <i>Catalpa bignonioides</i>                                    | Stems                     | PB4541.2  | MeOH |
| <i>Mitchella undulata</i>                                      | Whole plant               | PB4583.1  | MeOH |
| <i>Galium spurium</i>                                          | Whole plant               | PB4599.1  | MeOH |
| <i>Sambucus sieboldiana</i>                                    | Leaves                    | PB4622.1  | MeOH |
| <i>Sambucus sieboldiana</i>                                    | Stems-Heartwood           | PB4622.2  | MeOH |
| <i>Sambucus sieboldiana</i>                                    | Stems-Stembark            | PB4622.3  | MeOH |
| <i>Weigela florida</i>                                         | Leaves, Flowers           | PB4655.3  | MeOH |
| <i>Weigela florida</i>                                         | Stems                     | PB4655.4  | MeOH |
| <i>Lonicera chrysantha</i> var. <i>crassipes</i>               | Leaves, Flowers           | PB4672.1  | MeOH |

|                                                     |             |           |      |
|-----------------------------------------------------|-------------|-----------|------|
| <i>Lonicera coreana</i>                             | Leaves      | PB4687.1  | MeOH |
| <i>Lonicera coreana</i>                             | Stems       | PB4687.2  | MeOH |
| <i>Lonicera vidalii</i>                             | Leaves      | PB4688.1  | MeOH |
| <i>Trichosanthes kirilowii</i> var. <i>japonica</i> | Fruit flesh | PB4725.2  | MeOH |
| <i>Adenophora racemosa</i>                          | Whole plant | PB4737A.1 | MeOH |
| <i>Campanula takesimana</i>                         | Whole plant | PB4744.2  | MeOH |
| <i>Campanula glomerata</i> var. <i>dahurica</i>     | Whole plant | PB4747.1  | MeOH |
| <i>Gnaphalium japonicum</i>                         | Whole plant | PB4766.1  | MeOH |
| <i>Adenocaulon himalaicum</i>                       | Whole plant | PB4924.1  | MeOH |
| <i>Taraxacum mongolicum</i>                         | Whole plant | PB5023.2  | MeOH |
| <i>Ixeris stolonifera</i>                           | Whole plant | PB5036.1  | MeOH |
| <i>Sonchus oleraceus</i>                            | Whole plant | PB5051.2  | MeOH |
| <i>Youngia japonica</i>                             | Whole plant | PB5053.2  | MeOH |
| <i>Arisaema takesimense</i>                         | Fruits      | PB5059.4  | MeOH |
| <i>Orostachys iwarenge</i>                          | Whole plant | PB5060.1  | MeOH |
